# Supplementary material for: Speciation of uranyl ions in fulvic acid and humic acid: a DFT exploration
Source: Royal Society of Chemistry journal article supplement (doi:10.1039/c1cp21238a), 2011-01-01
Supplement: c1cp21238a.pdf [file c1cp21238a.pdf]

# **Speciation of Uranyl Ion in Fulvic Acid and Humic Acid: A DFT exploration.**

**Mahesh Sundararajan, Gopalan Rajaraman, Swapan K Ghosh\***

**Supporting Information**

**(i) Force Field Parameters used for the GROMACS Molecular Dynamics Simulations.**

```
;
;
; This file was generated by PRODRG version AA081006.0504
; PRODRG written/copyrighted by Daan van Aalten
; and Alexander Schuettelkopf
;
; Questions/comments to dava@davapcl.bioch.dundee.ac.uk
;
; When using this software in a publication, cite:
; A. W. Schuettelkopf and D. M. F. van Aalten (2004).
; PRODRG - a tool for high-throughput crystallography
; of protein-ligand complexes.
; Acta Crystallogr. D60, 1355--1363.
;
;
; Include forcefield parameters
#include "ffG43a2.itp"
#include "spc.itp"
#include "ions.itp"

[ moleculetype ]
; Name nrexcl
xmo      3

[ atoms ]
;  nr      type  resnr  resid  atom  cgnr  charge  mass
  1         OA   1  xmo   OAA   1  -0.576698  15.9994
  2         H    1  xmo   HAA   1   0.459098   1.0080
  3         C    1  xmo   CAB   1   0.117712  12.0110
  4         C    1  xmo   CAC   1   0.347924  12.0110
  5         OA   1  xmo   OAD   1  -0.594066  15.9994
  6         H    1  xmo   HAD   1   0.461491   1.0080
  7        CR1   1  xmo   CAE   2  -0.369880  12.0110
  8         HC   1  xmo   HAE   2   0.188810   1.0080
  9         C    1  xmo   CAF   2  -0.038806  12.0110
 10         C    1  xmo   CAG   2   0.683461  12.0110
 11         OM   1  xmo   OAH   2  -0.744918  15.9994
 12         OM   1  xmo   OAI   2  -0.742148  15.9994
 13        CR1   1  xmo   CAJ   2  -0.273303  12.0110
 14         HC   1  xmo   HAJ   2   0.141299   1.0080
 15         C    1  xmo   CAK   3  -0.073693  12.0110
 16         C    1  xmo   CAL   3   0.141526  12.0110
 17         C    1  xmo   CAM   3   0.038367  12.0110
 18         OA   1  xmo   OAN   3  -0.465363  15.9994
 19         H    1  xmo   HAN   3   0.429890   1.0080
 20        CR1   1  xmo   CAO   4  -0.324247  12.0110
 21         HC   1  xmo   HAO   4   0.164959   1.0080
 22         C    1  xmo   CAP   4  -0.002151  12.0110
 23         C    1  xmo   CAQ   4   0.665930  12.0110
 24         OM   1  xmo   OAR   4  -0.733273  15.9994
 25         OM   1  xmo   OAS   4  -0.727512  15.9994
```

|    |     |   |     |     |    |           |         |
|----|-----|---|-----|-----|----|-----------|---------|
| 26 | CR1 | 1 | xmo | CAT | 4  | -0.296356 | 12.0110 |
| 27 | HC  | 1 | xmo | HAT | 4  | 0.181993  | 1.0080  |
| 28 | C   | 1 | xmo | CAU | 4  | 0.228419  | 12.0110 |
| 29 | O   | 1 | xmo | OAV | 5  | -0.278177 | 15.9994 |
| 30 | C   | 1 | xmo | CAW | 5  | 0.330069  | 12.0110 |
| 31 | C   | 1 | xmo | CAX | 5  | 0.262581  | 12.0110 |
| 32 | CR1 | 1 | xmo | CAY | 5  | -0.158836 | 12.0110 |
| 33 | HC  | 1 | xmo | HAY | 5  | 0.180102  | 1.0080  |
| 34 | OA  | 1 | xmo | OAZ | 6  | -0.522415 | 15.9994 |
| 35 | H   | 1 | xmo | HAZ | 6  | 0.423136  | 1.0080  |
| 36 | CR1 | 1 | xmo | CBA | 6  | -0.525627 | 12.0110 |
| 37 | HC  | 1 | xmo | HBA | 6  | 0.262224  | 1.0080  |
| 38 | C   | 1 | xmo | CBB | 6  | 0.695849  | 12.0110 |
| 39 | OA  | 1 | xmo | OBC | 6  | -0.343367 | 15.9994 |
| 40 | C   | 1 | xmo | CBD | 6  | -0.525060 | 12.0110 |
| 41 | C   | 1 | xmo | CBE | 6  | 0.853441  | 12.0110 |
| 42 | OA  | 1 | xmo | OBF | 6  | -0.529887 | 15.9994 |
| 43 | H   | 1 | xmo | HBF | 6  | 0.497463  | 1.0080  |
| 44 | C   | 1 | xmo | CBG | 7  | -0.688654 | 12.0110 |
| 45 | C   | 1 | xmo | CBH | 7  | 0.757080  | 12.0110 |
| 46 | O   | 1 | xmo | OBI | 7  | -0.462255 | 15.9994 |
| 47 | C   | 1 | xmo | CBJ | 7  | 0.440209  | 12.0110 |
| 48 | C   | 1 | xmo | CBK | 7  | 0.496020  | 12.0110 |
| 49 | O   | 1 | xmo | OBL | 8  | -0.448084 | 15.9994 |
| 50 | CR1 | 1 | xmo | CBM | 8  | -0.403051 | 12.0110 |
| 51 | HC  | 1 | xmo | HBM | 8  | 0.218397  | 1.0080  |
| 52 | C   | 1 | xmo | CBN | 8  | 0.073984  | 12.0110 |
| 53 | OA  | 1 | xmo | OBO | 8  | -0.284586 | 15.9994 |
| 54 | C   | 1 | xmo | CBP | 8  | -0.037937 | 12.0110 |
| 55 | C   | 1 | xmo | CBQ | 8  | 0.395056  | 12.0110 |
| 56 | CR1 | 1 | xmo | CBR | 8  | -0.461153 | 12.0110 |
| 57 | HC  | 1 | xmo | HBR | 8  | 0.205766  | 1.0080  |
| 58 | OA  | 1 | xmo | OBS | 9  | -0.581566 | 15.9994 |
| 59 | H   | 1 | xmo | HBS | 9  | 0.466455  | 1.0080  |
| 60 | C   | 1 | xmo | CBT | 9  | 0.272074  | 12.0110 |
| 61 | N   | 1 | xmo | N   | 9  | -0.363977 | 14.0067 |
| 62 | H   | 1 | xmo | H   | 9  | 0.303412  | 1.0080  |
| 63 | CH1 | 1 | xmo | CA  | 9  | 0.048168  | 13.0190 |
| 64 | C   | 1 | xmo | C   | 9  | 0.638395  | 12.0110 |
| 65 | O   | 1 | xmo | O   | 9  | -0.579295 | 15.9994 |
| 66 | NT  | 1 | xmo | NBY | 9  | -0.797435 | 14.0067 |
| 67 | H   | 1 | xmo | HKL | 9  | 0.415355  | 1.0080  |
| 68 | H   | 1 | xmo | HBY | 9  | 0.392692  | 1.0080  |
| 69 | C   | 1 | xmo | CBZ | 10 | -0.057018 | 12.0110 |
| 70 | CR1 | 1 | xmo | CCA | 10 | -0.136099 | 12.0110 |
| 71 | HC  | 1 | xmo | HCA | 10 | 0.137495  | 1.0080  |
| 72 | CR1 | 1 | xmo | CCB | 11 | -0.334459 | 12.0110 |
| 73 | HC  | 1 | xmo | HCB | 11 | 0.192255  | 1.0080  |
| 74 | C   | 1 | xmo | CCC | 11 | 0.417734  | 12.0110 |
| 75 | OA  | 1 | xmo | OCD | 12 | -0.642320 | 15.9994 |
| 76 | H   | 1 | xmo | HCD | 12 | 0.447045  | 1.0080  |
| 77 | CR1 | 1 | xmo | CCE | 12 | -0.255865 | 12.0110 |
| 78 | HC  | 1 | xmo | HCE | 12 | 0.151400  | 1.0080  |
| 79 | CR1 | 1 | xmo | CCF | 12 | -0.164125 | 12.0110 |
| 80 | HC  | 1 | xmo | HCF | 12 | 0.157382  | 1.0080  |
| 81 | CR1 | 1 | xmo | CCG | 12 | -0.404844 | 12.0110 |
| 82 | HC  | 1 | xmo | HCG | 12 | 0.237614  | 1.0080  |

|     |     |   |     |     |    |           |         |
|-----|-----|---|-----|-----|----|-----------|---------|
| 83  | C   | 1 | xmo | CCH | 12 | 0.065868  | 12.0110 |
| 84  | C   | 1 | xmo | CCI | 12 | 0.287148  | 12.0110 |
| 85  | NR  | 1 | xmo | NCJ | 12 | -0.493665 | 14.0067 |
| 86  | C   | 1 | xmo | CCK | 13 | 0.158466  | 12.0110 |
| 87  | OA  | 1 | xmo | OCL | 13 | -0.429410 | 15.9994 |
| 88  | C   | 1 | xmo | CCM | 13 | 0.770176  | 12.0110 |
| 89  | O   | 1 | xmo | OCN | 13 | -0.560395 | 15.9994 |
| 90  | CH1 | 1 | xmo | CCO | 13 | 0.189275  | 13.0190 |
| 91  | OA  | 1 | xmo | OCP | 14 | -0.626520 | 15.9994 |
| 92  | H   | 1 | xmo | HCP | 14 | 0.410412  | 1.0080  |
| 93  | CH1 | 1 | xmo | CCQ | 14 | 0.192882  | 13.0190 |
| 94  | OA  | 1 | xmo | OCR | 14 | -0.708073 | 15.9994 |
| 95  | H   | 1 | xmo | HCR | 14 | 0.471070  | 1.0080  |
| 96  | CH1 | 1 | xmo | CCS | 15 | 0.248365  | 13.0190 |
| 97  | OA  | 1 | xmo | OCT | 15 | -0.765117 | 15.9994 |
| 98  | H   | 1 | xmo | HCT | 15 | 0.499635  | 1.0080  |
| 99  | CH1 | 1 | xmo | CCU | 15 | 0.326333  | 13.0190 |
| 100 | C   | 1 | xmo | CCV | 15 | 0.419672  | 13.0190 |
| 101 | O   | 1 | xmo | OCW | 15 | -0.458617 | 15.9994 |
| 102 | OA  | 1 | xmo | OCX | 16 | -0.691333 | 15.9994 |
| 103 | H   | 1 | xmo | HCX | 16 | 0.439954  | 1.0080  |
| 104 | CR1 | 1 | xmo | CCY | 16 | -0.118707 | 12.0110 |
| 105 | HC  | 1 | xmo | HCY | 16 | 0.179658  | 1.0080  |
| 106 | C   | 1 | xmo | CCZ | 17 | -0.137310 | 12.0110 |
| 107 | CR1 | 1 | xmo | CDA | 18 | -0.326130 | 12.0110 |
| 108 | HC  | 1 | xmo | HDA | 18 | 0.180814  | 1.0080  |
| 109 | C   | 1 | xmo | CDB | 18 | 0.271988  | 12.0110 |
| 110 | C   | 1 | xmo | CDC | 18 | 0.383035  | 12.0110 |
| 111 | OA  | 1 | xmo | ODD | 18 | -0.641060 | 15.9994 |
| 112 | CR1 | 1 | xmo | CDE | 18 | -0.513396 | 12.0110 |
| 113 | HC  | 1 | xmo | HDE | 18 | 0.197411  | 1.0080  |
| 114 | C   | 1 | xmo | CDF | 18 | 0.290135  | 12.0110 |
| 115 | OA  | 1 | xmo | ODG | 18 | -0.330835 | 15.9994 |
| 116 | C   | 1 | xmo | CDH | 19 | 0.091289  | 12.0110 |
| 117 | CR1 | 1 | xmo | CDI | 20 | -0.079589 | 12.0110 |
| 118 | HC  | 1 | xmo | HDI | 20 | 0.144783  | 1.0080  |
| 119 | C   | 1 | xmo | CDJ | 20 | -0.259823 | 12.0110 |
| 120 | C   | 1 | xmo | CDK | 21 | 0.457293  | 12.0110 |
| 121 | O   | 1 | xmo | ODL | 21 | -0.498103 | 15.9994 |
| 122 | C   | 1 | xmo | CDM | 21 | 0.574311  | 12.0110 |
| 123 | O   | 1 | xmo | ODN | 21 | -0.563205 | 15.9994 |
| 124 | C   | 1 | xmo | CDO | 21 | -0.580216 | 12.0110 |
| 125 | C   | 1 | xmo | CDP | 21 | 0.587727  | 12.0110 |
| 126 | OA  | 1 | xmo | ODQ | 22 | -0.605622 | 15.9994 |
| 127 | H   | 1 | xmo | HDQ | 22 | 0.491349  | 1.0080  |
| 128 | C   | 1 | xmo | CDR | 22 | -0.234968 | 12.0110 |
| 129 | C   | 1 | xmo | CDS | 22 | -0.279350 | 12.0110 |
| 130 | C   | 1 | xmo | CDT | 22 | 0.427840  | 12.0110 |
| 131 | OA  | 1 | xmo | ODU | 22 | -0.600857 | 15.9994 |
| 132 | H   | 1 | xmo | HDU | 22 | 0.464519  | 1.0080  |
| 133 | C   | 1 | xmo | CDV | 23 | -0.332457 | 12.0110 |
| 134 | C   | 1 | xmo | CDW | 23 | 0.704330  | 12.0110 |
| 135 | OM  | 1 | xmo | ODX | 23 | -0.726707 | 15.9994 |
| 136 | OM  | 1 | xmo | ODY | 23 | -0.720857 | 15.9994 |
| 137 | C   | 1 | xmo | CDZ | 24 | 0.046345  | 12.0110 |
| 138 | C   | 1 | xmo | CEA | 24 | 0.654597  | 12.0110 |
| 139 | OM  | 1 | xmo | OEB | 24 | -0.745638 | 15.9994 |

|     |     |   |     |     |    |           |         |
|-----|-----|---|-----|-----|----|-----------|---------|
| 140 | OM  | 1 | xmo | OEC | 24 | -0.698017 | 15.9994 |
| 141 | CR1 | 1 | xmo | CED | 24 | -0.478709 | 12.0110 |
| 142 | HC  | 1 | xmo | HED | 24 | 0.211517  | 1.0080  |
| 143 | C   | 1 | xmo | CEE | 24 | 0.384116  | 12.0110 |
| 144 | O   | 1 | xmo | OEF | 25 | -0.305986 | 15.9994 |
| 145 | C   | 1 | xmo | CEG | 25 | 0.402354  | 12.0110 |
| 146 | CR1 | 1 | xmo | CEH | 25 | -0.376119 | 12.0110 |
| 147 | HC  | 1 | xmo | HEH | 25 | 0.195866  | 1.0080  |
| 148 | C   | 1 | xmo | CEI | 25 | 0.166510  | 12.0110 |
| 149 | C   | 1 | xmo | CEJ | 25 | 0.088889  | 12.0110 |
| 150 | CR1 | 1 | xmo | CEK | 26 | -0.367311 | 12.0110 |
| 151 | HC  | 1 | xmo | HEK | 26 | 0.217046  | 1.0080  |
| 152 | C   | 1 | xmo | CEL | 27 | 0.391685  | 12.0110 |
| 153 | OA  | 1 | xmo | OEM | 27 | -0.574029 | 15.9994 |
| 154 | H   | 1 | xmo | HEM | 27 | 0.472237  | 1.0080  |

[ bonds ]

| ; ai | aj | fu | c0, c1, ... |            |       |            |       |     |
|------|----|----|-------------|------------|-------|------------|-------|-----|
| 1    | 2  | 2  | 0.100       | 15700000.0 | 0.100 | 15700000.0 | ; OAA | HAA |
| 3    | 1  | 2  | 0.136       | 10200000.0 | 0.136 | 10200000.0 | ; CAB | OAA |
| 3    | 4  | 2  | 0.139       | 10800000.0 | 0.139 | 10800000.0 | ; CAB | CAC |
| 3    | 15 | 2  | 0.139       | 10800000.0 | 0.139 | 10800000.0 | ; CAB | CAK |
| 4    | 5  | 2  | 0.136       | 10200000.0 | 0.136 | 10200000.0 | ; CAC | OAD |
| 4    | 7  | 2  | 0.139       | 10800000.0 | 0.139 | 10800000.0 | ; CAC | CAE |
| 5    | 6  | 2  | 0.100       | 15700000.0 | 0.100 | 15700000.0 | ; OAD | HAD |
| 7    | 8  | 2  | 0.109       | 12300000.0 | 0.109 | 12300000.0 | ; CAE | HAE |
| 9    | 7  | 2  | 0.139       | 10800000.0 | 0.139 | 10800000.0 | ; CAF | CAE |
| 9    | 10 | 2  | 0.139       | 10800000.0 | 0.139 | 10800000.0 | ; CAF | CAG |
| 9    | 13 | 2  | 0.139       | 10800000.0 | 0.139 | 10800000.0 | ; CAF | CAJ |
| 10   | 11 | 2  | 0.125       | 13400000.0 | 0.125 | 13400000.0 | ; CAG | OAH |
| 10   | 12 | 2  | 0.125       | 13400000.0 | 0.125 | 13400000.0 | ; CAG | OAI |
| 13   | 14 | 2  | 0.109       | 12300000.0 | 0.109 | 12300000.0 | ; CAJ | HAJ |
| 15   | 13 | 2  | 0.139       | 10800000.0 | 0.139 | 10800000.0 | ; CAK | CAJ |
| 15   | 16 | 2  | 0.139       | 10800000.0 | 0.139 | 10800000.0 | ; CAK | CAL |
| 16   | 17 | 2  | 0.139       | 10800000.0 | 0.139 | 10800000.0 | ; CAL | CAM |
| 16   | 20 | 2  | 0.139       | 10800000.0 | 0.139 | 10800000.0 | ; CAL | CAO |
| 17   | 18 | 2  | 0.136       | 10200000.0 | 0.136 | 10200000.0 | ; CAM | OAN |
| 17   | 28 | 2  | 0.139       | 10800000.0 | 0.139 | 10800000.0 | ; CAM | CAU |
| 18   | 19 | 2  | 0.100       | 15700000.0 | 0.100 | 15700000.0 | ; OAN | HAN |
| 20   | 21 | 2  | 0.109       | 12300000.0 | 0.109 | 12300000.0 | ; CAO | HAO |
| 22   | 20 | 2  | 0.139       | 10800000.0 | 0.139 | 10800000.0 | ; CAP | CAO |
| 22   | 23 | 2  | 0.139       | 10800000.0 | 0.139 | 10800000.0 | ; CAP | CAQ |
| 22   | 26 | 2  | 0.139       | 10800000.0 | 0.139 | 10800000.0 | ; CAP | CAT |
| 23   | 24 | 2  | 0.125       | 13400000.0 | 0.125 | 13400000.0 | ; CAQ | OAR |
| 23   | 25 | 2  | 0.125       | 13400000.0 | 0.125 | 13400000.0 | ; CAQ | OAS |
| 26   | 27 | 2  | 0.109       | 12300000.0 | 0.109 | 12300000.0 | ; CAT | HAT |
| 28   | 26 | 2  | 0.139       | 10800000.0 | 0.139 | 10800000.0 | ; CAU | CAT |
| 28   | 29 | 2  | 0.137       | 3682150.9  | 0.137 | 3682150.9  | ; CAU | OAV |
| 30   | 29 | 2  | 0.137       | 3682150.9  | 0.137 | 3682150.9  | ; CAW | OAV |
| 30   | 31 | 2  | 0.139       | 10800000.0 | 0.139 | 10800000.0 | ; CAW | CAX |
| 30   | 36 | 2  | 0.139       | 10800000.0 | 0.139 | 10800000.0 | ; CAW | CBA |
| 31   | 32 | 2  | 0.139       | 10800000.0 | 0.139 | 10800000.0 | ; CAX | CAY |
| 31   | 34 | 2  | 0.136       | 10200000.0 | 0.136 | 10200000.0 | ; CAX | OAZ |
| 32   | 33 | 2  | 0.109       | 12300000.0 | 0.109 | 12300000.0 | ; CAY | HAY |
| 40   | 32 | 2  | 0.139       | 10800000.0 | 0.139 | 10800000.0 | ; CBD | CAY |
| 34   | 35 | 2  | 0.100       | 15700000.0 | 0.100 | 15700000.0 | ; OAZ | HAZ |
| 36   | 37 | 2  | 0.109       | 12300000.0 | 0.109 | 12300000.0 | ; CBA | HBA |

|     |     |   |       |            |       |              |     |     |
|-----|-----|---|-------|------------|-------|--------------|-----|-----|
| 38  | 36  | 2 | 0.139 | 10800000.0 | 0.139 | 10800000.0 ; | CBB | CBA |
| 38  | 39  | 2 | 0.136 | 10200000.0 | 0.136 | 10200000.0 ; | CBB | OBC |
| 38  | 40  | 2 | 0.139 | 10800000.0 | 0.139 | 10800000.0 ; | CBB | CBD |
| 47  | 39  | 2 | 0.136 | 10200000.0 | 0.136 | 10200000.0 ; | CBJ | OBC |
| 40  | 41  | 2 | 0.139 | 10800000.0 | 0.139 | 10800000.0 ; | CBD | CBE |
| 41  | 42  | 2 | 0.136 | 10200000.0 | 0.136 | 10200000.0 ; | CBE | OBF |
| 41  | 44  | 2 | 0.139 | 10800000.0 | 0.139 | 10800000.0 ; | CBE | CBG |
| 42  | 43  | 2 | 0.100 | 15700000.0 | 0.100 | 15700000.0 ; | OBF | HBF |
| 44  | 45  | 2 | 0.139 | 10800000.0 | 0.139 | 10800000.0 ; | CBG | CBH |
| 44  | 47  | 2 | 0.139 | 10800000.0 | 0.139 | 10800000.0 ; | CBG | CBJ |
| 45  | 46  | 2 | 0.123 | 16600000.0 | 0.123 | 16600000.0 ; | CBH | OBI |
| 45  | 52  | 2 | 0.139 | 10800000.0 | 0.139 | 10800000.0 ; | CBH | CBN |
| 47  | 48  | 2 | 0.139 | 10800000.0 | 0.139 | 10800000.0 ; | CBJ | CBK |
| 48  | 49  | 2 | 0.123 | 16600000.0 | 0.123 | 16600000.0 ; | CBK | OBL |
| 48  | 50  | 2 | 0.139 | 10800000.0 | 0.139 | 10800000.0 ; | CBK | CBM |
| 50  | 51  | 2 | 0.109 | 12300000.0 | 0.109 | 12300000.0 ; | CBM | HBM |
| 52  | 50  | 2 | 0.139 | 10800000.0 | 0.139 | 10800000.0 ; | CBN | CBM |
| 52  | 53  | 2 | 0.136 | 10200000.0 | 0.136 | 10200000.0 ; | CBN | OBO |
| 54  | 53  | 2 | 0.136 | 10200000.0 | 0.136 | 10200000.0 ; | CBP | OBO |
| 54  | 55  | 2 | 0.139 | 10800000.0 | 0.139 | 10800000.0 ; | CBP | CBQ |
| 54  | 60  | 2 | 0.139 | 10800000.0 | 0.139 | 10800000.0 ; | CBP | CBT |
| 55  | 56  | 2 | 0.139 | 10800000.0 | 0.139 | 10800000.0 ; | CBQ | CBR |
| 55  | 58  | 2 | 0.136 | 10200000.0 | 0.136 | 10200000.0 ; | CBQ | OBS |
| 56  | 57  | 2 | 0.109 | 12300000.0 | 0.109 | 12300000.0 ; | CBR | HBR |
| 83  | 56  | 2 | 0.139 | 10800000.0 | 0.139 | 10800000.0 ; | CCH | CBR |
| 58  | 59  | 2 | 0.100 | 15700000.0 | 0.100 | 15700000.0 ; | OBS | HBS |
| 60  | 61  | 2 | 0.133 | 10600000.0 | 0.133 | 10600000.0 ; | CBT | N   |
| 60  | 81  | 2 | 0.139 | 10800000.0 | 0.139 | 10800000.0 ; | CBT | CCG |
| 61  | 62  | 2 | 0.100 | 18700000.0 | 0.100 | 18700000.0 ; | N   | H   |
| 63  | 61  | 2 | 0.147 | 8710000.0  | 0.147 | 8710000.0 ;  | CA  | N   |
| 63  | 64  | 2 | 0.153 | 7150000.0  | 0.153 | 7150000.0 ;  | CA  | C   |
| 69  | 63  | 2 | 0.139 | 8660000.0  | 0.139 | 8660000.0 ;  | CBZ | CA  |
| 64  | 65  | 2 | 0.123 | 16600000.0 | 0.123 | 16600000.0 ; | C   | O   |
| 64  | 66  | 2 | 0.133 | 10600000.0 | 0.133 | 10600000.0 ; | C   | NBY |
| 66  | 67  | 2 | 0.100 | 18700000.0 | 0.100 | 18700000.0 ; | NBY | HKL |
| 66  | 68  | 2 | 0.100 | 18700000.0 | 0.100 | 18700000.0 ; | NBY | HBY |
| 69  | 70  | 2 | 0.139 | 10800000.0 | 0.139 | 10800000.0 ; | CBZ | CCA |
| 69  | 79  | 2 | 0.139 | 10800000.0 | 0.139 | 10800000.0 ; | CBZ | CCF |
| 70  | 71  | 2 | 0.109 | 12300000.0 | 0.109 | 12300000.0 ; | CCA | HCA |
| 70  | 72  | 2 | 0.139 | 10800000.0 | 0.139 | 10800000.0 ; | CCA | CCB |
| 72  | 73  | 2 | 0.109 | 12300000.0 | 0.109 | 12300000.0 ; | CCB | HCB |
| 74  | 72  | 2 | 0.139 | 10800000.0 | 0.139 | 10800000.0 ; | CCC | CCB |
| 74  | 75  | 2 | 0.136 | 10200000.0 | 0.136 | 10200000.0 ; | CCC | OCD |
| 74  | 77  | 2 | 0.139 | 10800000.0 | 0.139 | 10800000.0 ; | CCC | CCE |
| 75  | 76  | 2 | 0.100 | 15700000.0 | 0.100 | 15700000.0 ; | OCD | HCD |
| 77  | 78  | 2 | 0.109 | 12300000.0 | 0.109 | 12300000.0 ; | CCE | HCE |
| 77  | 79  | 2 | 0.139 | 10800000.0 | 0.139 | 10800000.0 ; | CCE | CCF |
| 79  | 80  | 2 | 0.109 | 12300000.0 | 0.109 | 12300000.0 ; | CCF | HCF |
| 81  | 82  | 2 | 0.109 | 12300000.0 | 0.109 | 12300000.0 ; | CCG | HCG |
| 83  | 81  | 2 | 0.139 | 10800000.0 | 0.139 | 10800000.0 ; | CCH | CCG |
| 83  | 84  | 2 | 0.139 | 10800000.0 | 0.139 | 10800000.0 ; | CCH | CCI |
| 84  | 85  | 2 | 0.134 | 11700000.0 | 0.134 | 11700000.0 ; | CCI | NCJ |
| 84  | 86  | 2 | 0.139 | 10800000.0 | 0.139 | 10800000.0 ; | CCI | CCK |
| 109 | 85  | 2 | 0.134 | 11700000.0 | 0.134 | 11700000.0 ; | CDB | NCJ |
| 86  | 87  | 2 | 0.136 | 10200000.0 | 0.136 | 10200000.0 ; | CCK | OCL |
| 86  | 104 | 2 | 0.139 | 10800000.0 | 0.139 | 10800000.0 ; | CCK | CCY |
| 88  | 87  | 2 | 0.136 | 10200000.0 | 0.136 | 10200000.0 ; | CCM | OCL |

|     |     |   |       |            |       |            |   |     |     |
|-----|-----|---|-------|------------|-------|------------|---|-----|-----|
| 88  | 89  | 2 | 0.123 | 16600000.0 | 0.123 | 16600000.0 | ; | CCM | OCN |
| 90  | 88  | 2 | 0.153 | 7150000.0  | 0.153 | 7150000.0  | ; | CCO | CCM |
| 90  | 91  | 2 | 0.143 | 8180000.0  | 0.143 | 8180000.0  | ; | CCO | OCP |
| 90  | 93  | 2 | 0.153 | 7150000.0  | 0.153 | 7150000.0  | ; | CCO | CCQ |
| 91  | 92  | 2 | 0.100 | 15700000.0 | 0.100 | 15700000.0 | ; | OCP | HCP |
| 93  | 94  | 2 | 0.143 | 8180000.0  | 0.143 | 8180000.0  | ; | CCQ | OCR |
| 93  | 96  | 2 | 0.153 | 7150000.0  | 0.153 | 7150000.0  | ; | CCQ | CCS |
| 94  | 95  | 2 | 0.100 | 15700000.0 | 0.100 | 15700000.0 | ; | OCR | HCR |
| 96  | 97  | 2 | 0.143 | 8180000.0  | 0.143 | 8180000.0  | ; | CCS | OCT |
| 96  | 99  | 2 | 0.153 | 7150000.0  | 0.153 | 7150000.0  | ; | CCS | CCU |
| 97  | 98  | 2 | 0.100 | 15700000.0 | 0.100 | 15700000.0 | ; | OCT | HCT |
| 99  | 100 | 2 | 0.153 | 7150000.0  | 0.153 | 7150000.0  | ; | CCU | CCV |
| 99  | 102 | 2 | 0.143 | 8180000.0  | 0.143 | 8180000.0  | ; | CCU | OCX |
| 100 | 101 | 2 | 0.123 | 16600000.0 | 0.123 | 16600000.0 | ; | CCV | OCW |
| 102 | 103 | 2 | 0.100 | 15700000.0 | 0.100 | 15700000.0 | ; | OCX | HCX |
| 104 | 105 | 2 | 0.109 | 12300000.0 | 0.109 | 12300000.0 | ; | CCY | HCY |
| 106 | 104 | 2 | 0.139 | 10800000.0 | 0.139 | 10800000.0 | ; | CCZ | CCY |
| 106 | 107 | 2 | 0.139 | 10800000.0 | 0.139 | 10800000.0 | ; | CCZ | CDA |
| 106 | 109 | 2 | 0.139 | 10800000.0 | 0.139 | 10800000.0 | ; | CCZ | CDB |
| 107 | 108 | 2 | 0.109 | 12300000.0 | 0.109 | 12300000.0 | ; | CDA | HDA |
| 114 | 107 | 2 | 0.139 | 10800000.0 | 0.139 | 10800000.0 | ; | CDF | CDA |
| 109 | 110 | 2 | 0.139 | 10800000.0 | 0.139 | 10800000.0 | ; | CDB | CDC |
| 110 | 111 | 2 | 0.136 | 10200000.0 | 0.136 | 10200000.0 | ; | CDC | ODD |
| 110 | 112 | 2 | 0.139 | 10800000.0 | 0.139 | 10800000.0 | ; | CDC | CDE |
| 112 | 113 | 2 | 0.109 | 12300000.0 | 0.109 | 12300000.0 | ; | CDE | HDE |
| 114 | 112 | 2 | 0.139 | 10800000.0 | 0.139 | 10800000.0 | ; | CDF | CDE |
| 114 | 115 | 2 | 0.136 | 10200000.0 | 0.136 | 10200000.0 | ; | CDF | ODG |
| 116 | 115 | 2 | 0.136 | 10200000.0 | 0.136 | 10200000.0 | ; | CDH | ODG |
| 116 | 117 | 2 | 0.139 | 10800000.0 | 0.139 | 10800000.0 | ; | CDH | CDI |
| 116 | 152 | 2 | 0.139 | 10800000.0 | 0.139 | 10800000.0 | ; | CDH | CEL |
| 117 | 118 | 2 | 0.109 | 12300000.0 | 0.109 | 12300000.0 | ; | CDI | HDI |
| 119 | 117 | 2 | 0.139 | 10800000.0 | 0.139 | 10800000.0 | ; | CDJ | CDI |
| 119 | 120 | 2 | 0.139 | 10800000.0 | 0.139 | 10800000.0 | ; | CDJ | CDK |
| 119 | 149 | 2 | 0.139 | 10800000.0 | 0.139 | 10800000.0 | ; | CDJ | CEJ |
| 120 | 121 | 2 | 0.123 | 16600000.0 | 0.123 | 16600000.0 | ; | CDK | ODL |
| 120 | 122 | 2 | 0.139 | 10800000.0 | 0.139 | 10800000.0 | ; | CDK | CDM |
| 122 | 123 | 2 | 0.123 | 16600000.0 | 0.123 | 16600000.0 | ; | CDM | ODN |
| 122 | 124 | 2 | 0.139 | 10800000.0 | 0.139 | 10800000.0 | ; | CDM | CDO |
| 124 | 125 | 2 | 0.139 | 10800000.0 | 0.139 | 10800000.0 | ; | CDO | CDP |
| 124 | 148 | 2 | 0.139 | 10800000.0 | 0.139 | 10800000.0 | ; | CDO | CEI |
| 125 | 126 | 2 | 0.136 | 10200000.0 | 0.136 | 10200000.0 | ; | CDP | ODQ |
| 125 | 128 | 2 | 0.133 | 11800000.0 | 0.133 | 11800000.0 | ; | CDP | CDR |
| 126 | 127 | 2 | 0.100 | 15700000.0 | 0.100 | 15700000.0 | ; | ODQ | HDQ |
| 128 | 129 | 2 | 0.133 | 11800000.0 | 0.133 | 11800000.0 | ; | CDR | CDS |
| 128 | 145 | 2 | 0.133 | 11800000.0 | 0.133 | 11800000.0 | ; | CDR | CEG |
| 129 | 130 | 2 | 0.133 | 11800000.0 | 0.133 | 11800000.0 | ; | CDS | CDT |
| 129 | 143 | 2 | 0.133 | 11800000.0 | 0.133 | 11800000.0 | ; | CDS | CEE |
| 130 | 131 | 2 | 0.136 | 10200000.0 | 0.136 | 10200000.0 | ; | CDT | ODU |
| 130 | 133 | 2 | 0.139 | 10800000.0 | 0.139 | 10800000.0 | ; | CDT | CDV |
| 131 | 132 | 2 | 0.100 | 15700000.0 | 0.100 | 15700000.0 | ; | ODU | HDU |
| 133 | 134 | 2 | 0.139 | 10800000.0 | 0.139 | 10800000.0 | ; | CDV | CDW |
| 133 | 137 | 2 | 0.139 | 10800000.0 | 0.139 | 10800000.0 | ; | CDV | CDZ |
| 134 | 135 | 2 | 0.125 | 13400000.0 | 0.125 | 13400000.0 | ; | CDW | ODX |
| 134 | 136 | 2 | 0.125 | 13400000.0 | 0.125 | 13400000.0 | ; | CDW | ODY |
| 137 | 138 | 2 | 0.139 | 10800000.0 | 0.139 | 10800000.0 | ; | CDZ | CEA |
| 137 | 141 | 2 | 0.139 | 10800000.0 | 0.139 | 10800000.0 | ; | CDZ | CED |
| 138 | 139 | 2 | 0.125 | 13400000.0 | 0.125 | 13400000.0 | ; | CEA | OEB |

|     |     |   |       |            |       |            |   |     |     |
|-----|-----|---|-------|------------|-------|------------|---|-----|-----|
| 138 | 140 | 2 | 0.125 | 13400000.0 | 0.125 | 13400000.0 | ; | CEA | OEC |
| 141 | 142 | 2 | 0.109 | 12300000.0 | 0.109 | 12300000.0 | ; | CED | HED |
| 143 | 141 | 2 | 0.133 | 11800000.0 | 0.133 | 11800000.0 | ; | CEE | CED |
| 143 | 144 | 2 | 0.137 | 3682150.9  | 0.137 | 3682150.9  | ; | CEE | OEF |
| 145 | 144 | 2 | 0.137 | 3682150.9  | 0.137 | 3682150.9  | ; | CEG | OEF |
| 145 | 146 | 2 | 0.133 | 11800000.0 | 0.133 | 11800000.0 | ; | CEG | CEH |
| 146 | 147 | 2 | 0.109 | 12300000.0 | 0.109 | 12300000.0 | ; | CEH | HEH |
| 148 | 146 | 2 | 0.139 | 10800000.0 | 0.139 | 10800000.0 | ; | CEI | CEH |
| 148 | 149 | 2 | 0.139 | 10800000.0 | 0.139 | 10800000.0 | ; | CEI | CEJ |
| 149 | 150 | 2 | 0.139 | 10800000.0 | 0.139 | 10800000.0 | ; | CEJ | CEK |
| 150 | 151 | 2 | 0.109 | 12300000.0 | 0.109 | 12300000.0 | ; | CEK | HEK |
| 152 | 150 | 2 | 0.139 | 10800000.0 | 0.139 | 10800000.0 | ; | CEL | CEK |
| 152 | 153 | 2 | 0.136 | 10200000.0 | 0.136 | 10200000.0 | ; | CEL | OEM |
| 153 | 154 | 2 | 0.100 | 15700000.0 | 0.100 | 15700000.0 | ; | OEM | HEM |

[ pairs ]

| ; | ai | aj | fu | c0, c1, ... |   |     |     |  |  |
|---|----|----|----|-------------|---|-----|-----|--|--|
|   | 1  | 5  | 1  |             | ; | OAA | OAD |  |  |
|   | 1  | 7  | 1  |             | ; | OAA | CAE |  |  |
|   | 1  | 13 | 1  |             | ; | OAA | CAJ |  |  |
|   | 1  | 16 | 1  |             | ; | OAA | CAL |  |  |
|   | 2  | 4  | 1  |             | ; | HAA | CAC |  |  |
|   | 2  | 15 | 1  |             | ; | HAA | CAK |  |  |
|   | 3  | 6  | 1  |             | ; | CAB | HAD |  |  |
|   | 3  | 8  | 1  |             | ; | CAB | HAE |  |  |
|   | 3  | 9  | 1  |             | ; | CAB | CAF |  |  |
|   | 3  | 14 | 1  |             | ; | CAB | HAJ |  |  |
|   | 3  | 17 | 1  |             | ; | CAB | CAM |  |  |
|   | 3  | 20 | 1  |             | ; | CAB | CAO |  |  |
|   | 4  | 10 | 1  |             | ; | CAC | CAG |  |  |
|   | 4  | 13 | 1  |             | ; | CAC | CAJ |  |  |
|   | 4  | 16 | 1  |             | ; | CAC | CAL |  |  |
|   | 5  | 8  | 1  |             | ; | OAD | HAE |  |  |
|   | 5  | 9  | 1  |             | ; | OAD | CAF |  |  |
|   | 5  | 15 | 1  |             | ; | OAD | CAK |  |  |
|   | 6  | 7  | 1  |             | ; | HAD | CAE |  |  |
|   | 7  | 11 | 1  |             | ; | CAE | OAH |  |  |
|   | 7  | 12 | 1  |             | ; | CAE | OAI |  |  |
|   | 7  | 14 | 1  |             | ; | CAE | HAJ |  |  |
|   | 7  | 15 | 1  |             | ; | CAE | CAK |  |  |
|   | 8  | 10 | 1  |             | ; | HAE | CAG |  |  |
|   | 8  | 13 | 1  |             | ; | HAE | CAJ |  |  |
|   | 9  | 16 | 1  |             | ; | CAF | CAL |  |  |
|   | 10 | 14 | 1  |             | ; | CAG | HAJ |  |  |
|   | 10 | 15 | 1  |             | ; | CAG | CAK |  |  |
|   | 11 | 13 | 1  |             | ; | OAH | CAJ |  |  |
|   | 12 | 13 | 1  |             | ; | OAI | CAJ |  |  |
|   | 13 | 17 | 1  |             | ; | CAJ | CAM |  |  |
|   | 13 | 20 | 1  |             | ; | CAJ | CAO |  |  |
|   | 14 | 16 | 1  |             | ; | HAJ | CAL |  |  |
|   | 15 | 18 | 1  |             | ; | CAK | OAN |  |  |
|   | 15 | 21 | 1  |             | ; | CAK | HAO |  |  |
|   | 15 | 22 | 1  |             | ; | CAK | CAP |  |  |
|   | 15 | 28 | 1  |             | ; | CAK | CAU |  |  |
|   | 16 | 19 | 1  |             | ; | CAL | HAN |  |  |
|   | 16 | 23 | 1  |             | ; | CAL | CAQ |  |  |
|   | 16 | 26 | 1  |             | ; | CAL | CAT |  |  |



|    |    |   |   |     |     |
|----|----|---|---|-----|-----|
| 16 | 29 | 1 | ; | CAL | OAV |
| 17 | 21 | 1 | ; | CAM | HAO |
| 17 | 22 | 1 | ; | CAM | CAP |
| 17 | 27 | 1 | ; | CAM | HAT |
| 17 | 30 | 1 | ; | CAM | CAW |
| 18 | 20 | 1 | ; | OAN | CAO |
| 18 | 26 | 1 | ; | OAN | CAT |
| 18 | 29 | 1 | ; | OAN | OAV |
| 19 | 28 | 1 | ; | HAN | CAU |
| 20 | 24 | 1 | ; | CAO | OAR |
| 20 | 25 | 1 | ; | CAO | OAS |
| 20 | 27 | 1 | ; | CAO | HAT |
| 20 | 28 | 1 | ; | CAO | CAU |
| 21 | 23 | 1 | ; | HAO | CAQ |
| 21 | 26 | 1 | ; | HAO | CAT |
| 22 | 29 | 1 | ; | CAP | OAV |
| 23 | 27 | 1 | ; | CAQ | HAT |
| 23 | 28 | 1 | ; | CAQ | CAU |
| 24 | 26 | 1 | ; | OAR | CAT |
| 25 | 26 | 1 | ; | OAS | CAT |
| 26 | 30 | 1 | ; | CAT | CAW |
| 27 | 29 | 1 | ; | HAT | OAV |
| 28 | 31 | 1 | ; | CAU | CAX |
| 28 | 36 | 1 | ; | CAU | CBA |
| 29 | 32 | 1 | ; | OAV | CAY |
| 29 | 34 | 1 | ; | OAV | OAZ |
| 29 | 37 | 1 | ; | OAV | HBA |
| 29 | 38 | 1 | ; | OAV | CBB |
| 30 | 33 | 1 | ; | CAW | HAY |
| 30 | 35 | 1 | ; | CAW | HAZ |
| 30 | 39 | 1 | ; | CAW | OBC |
| 30 | 40 | 1 | ; | CAW | CBD |
| 31 | 37 | 1 | ; | CAX | HBA |
| 31 | 38 | 1 | ; | CAX | CBB |
| 31 | 41 | 1 | ; | CAX | CBE |
| 32 | 35 | 1 | ; | CAY | HAZ |
| 32 | 36 | 1 | ; | CAY | CBA |
| 32 | 39 | 1 | ; | CAY | OBC |
| 32 | 42 | 1 | ; | CAY | OBF |
| 32 | 44 | 1 | ; | CAY | CBG |
| 33 | 34 | 1 | ; | HAY | OAZ |
| 33 | 38 | 1 | ; | HAY | CBB |
| 33 | 41 | 1 | ; | HAY | CBE |
| 34 | 36 | 1 | ; | OAZ | CBA |
| 34 | 40 | 1 | ; | OAZ | CBD |
| 36 | 41 | 1 | ; | CBA | CBE |
| 36 | 47 | 1 | ; | CBA | CBJ |
| 37 | 39 | 1 | ; | HBA | OBC |
| 37 | 40 | 1 | ; | HBA | CBD |
| 38 | 42 | 1 | ; | CBB | OBF |
| 38 | 44 | 1 | ; | CBB | CBG |
| 38 | 48 | 1 | ; | CBB | CBK |
| 39 | 41 | 1 | ; | OBC | CBE |
| 39 | 45 | 1 | ; | OBC | CBH |
| 39 | 49 | 1 | ; | OBC | OBL |
| 39 | 50 | 1 | ; | OBC | CBM |
| 40 | 43 | 1 | ; | CBD | HBF |

|    |    |   |   |     |     |
|----|----|---|---|-----|-----|
| 40 | 45 | 1 | ; | CBD | CBH |
| 40 | 47 | 1 | ; | CBD | CBJ |
| 41 | 46 | 1 | ; | CBE | OBI |
| 41 | 48 | 1 | ; | CBE | CBK |
| 41 | 52 | 1 | ; | CBE | CBN |
| 42 | 45 | 1 | ; | OBF | CBH |
| 42 | 47 | 1 | ; | OBF | CBJ |
| 43 | 44 | 1 | ; | HBF | CBG |
| 44 | 49 | 1 | ; | CBG | OBL |
| 44 | 50 | 1 | ; | CBG | CBM |
| 44 | 53 | 1 | ; | CBG | OBO |
| 45 | 48 | 1 | ; | CBH | CBK |
| 45 | 51 | 1 | ; | CBH | HBM |
| 45 | 54 | 1 | ; | CBH | CBP |
| 46 | 47 | 1 | ; | OBI | CBJ |
| 46 | 50 | 1 | ; | OBI | CBM |
| 46 | 53 | 1 | ; | OBI | OBO |
| 47 | 51 | 1 | ; | CBJ | HBM |
| 47 | 52 | 1 | ; | CBJ | CBN |
| 48 | 53 | 1 | ; | CBK | OBO |
| 49 | 51 | 1 | ; | OBL | HBM |
| 49 | 52 | 1 | ; | OBL | CBN |
| 50 | 54 | 1 | ; | CBM | CBP |
| 51 | 53 | 1 | ; | HBM | OBO |
| 52 | 55 | 1 | ; | CBN | CBQ |
| 52 | 60 | 1 | ; | CBN | CBT |
| 53 | 56 | 1 | ; | OBO | CBR |
| 53 | 58 | 1 | ; | OBO | OBS |
| 53 | 61 | 1 | ; | OBO | N   |
| 53 | 81 | 1 | ; | OBO | CCG |
| 54 | 57 | 1 | ; | CBP | HBR |
| 54 | 59 | 1 | ; | CBP | HBS |
| 54 | 62 | 1 | ; | CBP | H   |
| 54 | 63 | 1 | ; | CBP | CA  |
| 54 | 82 | 1 | ; | CBP | HCG |
| 54 | 83 | 1 | ; | CBP | CCH |
| 55 | 61 | 1 | ; | CBQ | N   |
| 55 | 81 | 1 | ; | CBQ | CCG |
| 55 | 84 | 1 | ; | CBQ | CCI |
| 56 | 59 | 1 | ; | CBR | HBS |
| 56 | 60 | 1 | ; | CBR | CBT |
| 56 | 82 | 1 | ; | CBR | HCG |
| 56 | 85 | 1 | ; | CBR | NCJ |
| 56 | 86 | 1 | ; | CBR | CCK |
| 57 | 58 | 1 | ; | HBR | OBS |
| 57 | 81 | 1 | ; | HBR | CCG |
| 57 | 84 | 1 | ; | HBR | CCI |
| 58 | 60 | 1 | ; | OBS | CBT |
| 58 | 83 | 1 | ; | OBS | CCH |
| 60 | 64 | 1 | ; | CBT | C   |
| 60 | 69 | 1 | ; | CBT | CBZ |
| 60 | 84 | 1 | ; | CBT | CCI |
| 61 | 65 | 1 | ; | N   | O   |
| 61 | 66 | 1 | ; | N   | NBY |
| 61 | 70 | 1 | ; | N   | CCA |
| 61 | 79 | 1 | ; | N   | CCF |
| 61 | 82 | 1 | ; | N   | HCG |

|    |     |   |   |     |     |
|----|-----|---|---|-----|-----|
| 61 | 83  | 1 | ; | N   | CCH |
| 62 | 64  | 1 | ; | H   | C   |
| 62 | 69  | 1 | ; | H   | CBZ |
| 62 | 81  | 1 | ; | H   | CCG |
| 63 | 67  | 1 | ; | CA  | HKL |
| 63 | 68  | 1 | ; | CA  | HBV |
| 63 | 71  | 1 | ; | CA  | HCA |
| 63 | 72  | 1 | ; | CA  | CCB |
| 63 | 77  | 1 | ; | CA  | CCE |
| 63 | 80  | 1 | ; | CA  | HCF |
| 63 | 81  | 1 | ; | CA  | CCG |
| 64 | 70  | 1 | ; | C   | CCA |
| 64 | 79  | 1 | ; | C   | CCF |
| 65 | 67  | 1 | ; | O   | HKL |
| 65 | 68  | 1 | ; | O   | HBV |
| 65 | 69  | 1 | ; | O   | CBZ |
| 66 | 69  | 1 | ; | NBY | CBZ |
| 69 | 73  | 1 | ; | CBZ | HCN |
| 69 | 74  | 1 | ; | CBZ | CCC |
| 69 | 78  | 1 | ; | CBZ | HCE |
| 70 | 75  | 1 | ; | CCA | OCN |
| 70 | 77  | 1 | ; | CCA | CCE |
| 70 | 80  | 1 | ; | CCA | HCF |
| 71 | 73  | 1 | ; | HCA | HCN |
| 71 | 74  | 1 | ; | HCA | CCC |
| 71 | 79  | 1 | ; | HCA | CCF |
| 72 | 76  | 1 | ; | CCB | HCD |
| 72 | 78  | 1 | ; | CCB | HCE |
| 72 | 79  | 1 | ; | CCB | CCF |
| 73 | 75  | 1 | ; | HCN | OCN |
| 73 | 77  | 1 | ; | HCN | CCE |
| 74 | 80  | 1 | ; | CCC | HCF |
| 75 | 78  | 1 | ; | OCN | HCE |
| 75 | 79  | 1 | ; | OCN | CCF |
| 76 | 77  | 1 | ; | HCD | CCE |
| 78 | 80  | 1 | ; | HCE | HCF |
| 81 | 85  | 1 | ; | CCG | NCJ |
| 81 | 86  | 1 | ; | CCG | CCK |
| 82 | 84  | 1 | ; | HCG | CCI |
| 83 | 87  | 1 | ; | CCH | OCL |
| 83 | 104 | 1 | ; | CCH | CCY |
| 83 | 109 | 1 | ; | CCH | CDB |
| 84 | 88  | 1 | ; | CCI | CCM |
| 84 | 105 | 1 | ; | CCI | HCY |
| 84 | 106 | 1 | ; | CCI | CCZ |
| 84 | 110 | 1 | ; | CCI | CDC |
| 85 | 87  | 1 | ; | NCJ | OCL |
| 85 | 104 | 1 | ; | NCJ | CCY |
| 85 | 107 | 1 | ; | NCJ | CDA |
| 85 | 111 | 1 | ; | NCJ | ODD |
| 85 | 112 | 1 | ; | NCJ | CDE |
| 86 | 89  | 1 | ; | CCK | OCN |
| 86 | 90  | 1 | ; | CCK | CCO |
| 86 | 107 | 1 | ; | CCK | CDA |
| 86 | 109 | 1 | ; | CCK | CDB |
| 87 | 91  | 1 | ; | OCL | OCP |
| 87 | 93  | 1 | ; | OCL | CCQ |

|     |     |   |   |     |     |
|-----|-----|---|---|-----|-----|
| 87  | 105 | 1 | ; | OCL | HCY |
| 87  | 106 | 1 | ; | OCL | CCZ |
| 88  | 92  | 1 | ; | CCM | HCP |
| 88  | 94  | 1 | ; | CCM | OCR |
| 88  | 96  | 1 | ; | CCM | CCS |
| 88  | 104 | 1 | ; | CCM | CCY |
| 89  | 91  | 1 | ; | OCN | OCP |
| 89  | 93  | 1 | ; | OCN | CCQ |
| 90  | 95  | 1 | ; | CCO | HCR |
| 90  | 97  | 1 | ; | CCO | OCT |
| 90  | 99  | 1 | ; | CCO | CCU |
| 91  | 94  | 1 | ; | OCP | OCR |
| 91  | 96  | 1 | ; | OCP | CCS |
| 92  | 93  | 1 | ; | HCP | CCQ |
| 93  | 98  | 1 | ; | CCQ | HCT |
| 93  | 100 | 1 | ; | CCQ | CCV |
| 93  | 102 | 1 | ; | CCQ | OCX |
| 94  | 97  | 1 | ; | OCR | OCT |
| 94  | 99  | 1 | ; | OCR | CCU |
| 95  | 96  | 1 | ; | HCR | CCS |
| 96  | 101 | 1 | ; | CCS | OCW |
| 96  | 103 | 1 | ; | CCS | HCX |
| 97  | 100 | 1 | ; | OCT | CCV |
| 97  | 102 | 1 | ; | OCT | OCX |
| 98  | 99  | 1 | ; | HCT | CCU |
| 100 | 103 | 1 | ; | CCV | HCX |
| 101 | 102 | 1 | ; | OCW | OCX |
| 104 | 108 | 1 | ; | CCY | HDA |
| 104 | 110 | 1 | ; | CCY | CDC |
| 104 | 114 | 1 | ; | CCY | CDF |
| 105 | 107 | 1 | ; | HCY | CDA |
| 105 | 109 | 1 | ; | HCY | CDB |
| 106 | 111 | 1 | ; | CCZ | ODD |
| 106 | 112 | 1 | ; | CCZ | CDE |
| 106 | 115 | 1 | ; | CCZ | ODG |
| 107 | 110 | 1 | ; | CDA | CDC |
| 107 | 113 | 1 | ; | CDA | HDE |
| 107 | 116 | 1 | ; | CDA | CDH |
| 108 | 109 | 1 | ; | HDA | CDB |
| 108 | 112 | 1 | ; | HDA | CDE |
| 108 | 115 | 1 | ; | HDA | ODG |
| 109 | 113 | 1 | ; | CDB | HDE |
| 109 | 114 | 1 | ; | CDB | CDF |
| 110 | 115 | 1 | ; | CDC | ODG |
| 111 | 113 | 1 | ; | ODD | HDE |
| 111 | 114 | 1 | ; | ODD | CDF |
| 112 | 116 | 1 | ; | CDE | CDH |
| 113 | 115 | 1 | ; | HDE | ODG |
| 114 | 117 | 1 | ; | CDF | CDI |
| 114 | 152 | 1 | ; | CDF | CEL |
| 115 | 118 | 1 | ; | ODG | HDI |
| 115 | 119 | 1 | ; | ODG | CDJ |
| 115 | 150 | 1 | ; | ODG | CEK |
| 115 | 153 | 1 | ; | ODG | OEM |
| 116 | 120 | 1 | ; | CDH | CDK |
| 116 | 149 | 1 | ; | CDH | CEJ |
| 116 | 151 | 1 | ; | CDH | HEK |

|     |     |   |   |     |     |
|-----|-----|---|---|-----|-----|
| 116 | 154 | 1 | ; | CDH | HEM |
| 117 | 121 | 1 | ; | CDI | ODL |
| 117 | 122 | 1 | ; | CDI | CDM |
| 117 | 148 | 1 | ; | CDI | CEI |
| 117 | 150 | 1 | ; | CDI | CEK |
| 117 | 153 | 1 | ; | CDI | OEM |
| 118 | 120 | 1 | ; | HDI | CDK |
| 118 | 149 | 1 | ; | HDI | CEJ |
| 118 | 152 | 1 | ; | HDI | CEL |
| 119 | 123 | 1 | ; | CDJ | ODN |
| 119 | 124 | 1 | ; | CDJ | CDO |
| 119 | 146 | 1 | ; | CDJ | CEH |
| 119 | 151 | 1 | ; | CDJ | HEK |
| 119 | 152 | 1 | ; | CDJ | CEL |
| 120 | 125 | 1 | ; | CDK | CDP |
| 120 | 148 | 1 | ; | CDK | CEI |
| 120 | 150 | 1 | ; | CDK | CEK |
| 121 | 123 | 1 | ; | ODL | ODN |
| 121 | 124 | 1 | ; | ODL | CDO |
| 121 | 149 | 1 | ; | ODL | CEJ |
| 122 | 126 | 1 | ; | CDM | ODQ |
| 122 | 128 | 1 | ; | CDM | CDR |
| 122 | 146 | 1 | ; | CDM | CEH |
| 122 | 149 | 1 | ; | CDM | CEJ |
| 123 | 125 | 1 | ; | ODN | CDP |
| 123 | 148 | 1 | ; | ODN | CEI |
| 124 | 127 | 1 | ; | CDO | HDQ |
| 124 | 129 | 1 | ; | CDO | CDS |
| 124 | 145 | 1 | ; | CDO | CEG |
| 124 | 147 | 1 | ; | CDO | HEH |
| 124 | 150 | 1 | ; | CDO | CEK |
| 125 | 130 | 1 | ; | CDP | CDT |
| 125 | 143 | 1 | ; | CDP | CEE |
| 125 | 144 | 1 | ; | CDP | OEF |
| 125 | 146 | 1 | ; | CDP | CEH |
| 125 | 149 | 1 | ; | CDP | CEJ |
| 126 | 129 | 1 | ; | ODQ | CDS |
| 126 | 145 | 1 | ; | ODQ | CEG |
| 126 | 148 | 1 | ; | ODQ | CEI |
| 127 | 128 | 1 | ; | HDQ | CDR |
| 128 | 131 | 1 | ; | CDR | ODU |
| 128 | 133 | 1 | ; | CDR | CDV |
| 128 | 141 | 1 | ; | CDR | CED |
| 128 | 147 | 1 | ; | CDR | HEH |
| 128 | 148 | 1 | ; | CDR | CEI |
| 129 | 132 | 1 | ; | CDS | HDU |
| 129 | 134 | 1 | ; | CDS | CDW |
| 129 | 137 | 1 | ; | CDS | CDZ |
| 129 | 142 | 1 | ; | CDS | HED |
| 129 | 146 | 1 | ; | CDS | CEH |
| 130 | 135 | 1 | ; | CDT | ODX |
| 130 | 136 | 1 | ; | CDT | ODY |
| 130 | 138 | 1 | ; | CDT | CEA |
| 130 | 141 | 1 | ; | CDT | CED |
| 130 | 144 | 1 | ; | CDT | OEF |
| 130 | 145 | 1 | ; | CDT | CEG |
| 131 | 134 | 1 | ; | ODU | CDW |



|    |    |    |   |       |       |       |         |     |     |     |
|----|----|----|---|-------|-------|-------|---------|-----|-----|-----|
| 17 | 16 | 20 | 2 | 120.0 | 560.0 | 120.0 | 560.0 ; | CAM | CAL | CAO |
| 16 | 17 | 18 | 2 | 115.0 | 610.0 | 115.0 | 610.0 ; | CAL | CAM | OAN |
| 16 | 17 | 28 | 2 | 120.0 | 560.0 | 120.0 | 560.0 ; | CAL | CAM | CAU |
| 18 | 17 | 28 | 2 | 115.0 | 610.0 | 115.0 | 610.0 ; | OAN | CAM | CAU |
| 17 | 18 | 19 | 2 | 109.5 | 450.0 | 109.5 | 450.0 ; | CAM | OAN | HAN |
| 16 | 20 | 21 | 2 | 120.0 | 505.0 | 120.0 | 505.0 ; | CAL | CAO | HAO |
| 16 | 20 | 22 | 2 | 120.0 | 505.0 | 120.0 | 505.0 ; | CAL | CAO | CAP |
| 21 | 20 | 22 | 2 | 120.0 | 505.0 | 120.0 | 505.0 ; | HAO | CAO | CAP |
| 20 | 22 | 23 | 2 | 120.0 | 560.0 | 120.0 | 560.0 ; | CAO | CAP | CAQ |
| 20 | 22 | 26 | 2 | 120.0 | 560.0 | 120.0 | 560.0 ; | CAO | CAP | CAT |
| 23 | 22 | 26 | 2 | 120.0 | 560.0 | 120.0 | 560.0 ; | CAQ | CAP | CAT |
| 22 | 23 | 24 | 2 | 126.0 | 770.0 | 126.0 | 770.0 ; | CAP | CAQ | OAR |
| 22 | 23 | 25 | 2 | 126.0 | 770.0 | 126.0 | 770.0 ; | CAP | CAQ | OAS |
| 24 | 23 | 25 | 2 | 126.0 | 770.0 | 126.0 | 770.0 ; | OAR | CAQ | OAS |
| 22 | 26 | 27 | 2 | 120.0 | 505.0 | 120.0 | 505.0 ; | CAP | CAT | HAT |
| 22 | 26 | 28 | 2 | 120.0 | 505.0 | 120.0 | 505.0 ; | CAP | CAT | CAU |
| 27 | 26 | 28 | 2 | 120.0 | 505.0 | 120.0 | 505.0 ; | HAT | CAT | CAU |
| 17 | 28 | 26 | 2 | 120.0 | 560.0 | 120.0 | 560.0 ; | CAM | CAU | CAT |
| 17 | 28 | 29 | 2 | 121.0 | 685.0 | 121.0 | 685.0 ; | CAM | CAU | OAV |
| 26 | 28 | 29 | 2 | 120.0 | 560.0 | 120.0 | 560.0 ; | CAT | CAU | OAV |
| 28 | 29 | 30 | 2 | 108.5 | 418.7 | 108.5 | 418.7 ; | CAU | OAV | CAW |
| 29 | 30 | 31 | 2 | 121.0 | 685.0 | 121.0 | 685.0 ; | OAV | CAW | CAX |
| 29 | 30 | 36 | 2 | 120.0 | 560.0 | 120.0 | 560.0 ; | OAV | CAW | CBA |
| 31 | 30 | 36 | 2 | 120.0 | 560.0 | 120.0 | 560.0 ; | CAX | CAW | CBA |
| 30 | 31 | 32 | 2 | 120.0 | 560.0 | 120.0 | 560.0 ; | CAW | CAX | CAY |
| 30 | 31 | 34 | 2 | 115.0 | 610.0 | 115.0 | 610.0 ; | CAW | CAX | OAZ |
| 32 | 31 | 34 | 2 | 120.0 | 560.0 | 120.0 | 560.0 ; | CAY | CAX | OAZ |
| 31 | 32 | 33 | 2 | 120.0 | 505.0 | 120.0 | 505.0 ; | CAX | CAY | HAY |
| 31 | 32 | 40 | 2 | 120.0 | 505.0 | 120.0 | 505.0 ; | CAX | CAY | CBD |
| 33 | 32 | 40 | 2 | 120.0 | 505.0 | 120.0 | 505.0 ; | HAY | CAY | CBD |
| 31 | 34 | 35 | 2 | 109.5 | 450.0 | 109.5 | 450.0 ; | CAX | OAZ | HAZ |
| 30 | 36 | 37 | 2 | 120.0 | 505.0 | 120.0 | 505.0 ; | CAW | CBA | HBA |
| 30 | 36 | 38 | 2 | 120.0 | 505.0 | 120.0 | 505.0 ; | CAW | CBA | CBB |
| 37 | 36 | 38 | 2 | 120.0 | 505.0 | 120.0 | 505.0 ; | HBA | CBA | CBB |
| 36 | 38 | 39 | 2 | 120.0 | 560.0 | 120.0 | 560.0 ; | CBA | CBB | OBC |
| 36 | 38 | 40 | 2 | 120.0 | 560.0 | 120.0 | 560.0 ; | CBA | CBB | CBD |
| 39 | 38 | 40 | 2 | 115.0 | 610.0 | 115.0 | 610.0 ; | OBC | CBB | CBD |
| 38 | 39 | 47 | 2 | 109.5 | 380.0 | 109.5 | 380.0 ; | CBB | OBC | CBJ |
| 32 | 40 | 38 | 2 | 120.0 | 560.0 | 120.0 | 560.0 ; | CAY | CBD | CBB |
| 32 | 40 | 41 | 2 | 120.0 | 560.0 | 120.0 | 560.0 ; | CAY | CBD | CBE |
| 38 | 40 | 41 | 2 | 120.0 | 560.0 | 120.0 | 560.0 ; | CBB | CBD | CBE |
| 40 | 41 | 42 | 2 | 115.0 | 610.0 | 115.0 | 610.0 ; | CBD | CBE | OBF |
| 40 | 41 | 44 | 2 | 120.0 | 560.0 | 120.0 | 560.0 ; | CBD | CBE | CBG |
| 42 | 41 | 44 | 2 | 115.0 | 610.0 | 115.0 | 610.0 ; | OBF | CBE | CBG |
| 41 | 42 | 43 | 2 | 109.5 | 450.0 | 109.5 | 450.0 ; | CBE | OBF | HBF |
| 41 | 44 | 45 | 2 | 120.0 | 560.0 | 120.0 | 560.0 ; | CBE | CBG | CBH |
| 41 | 44 | 47 | 2 | 120.0 | 560.0 | 120.0 | 560.0 ; | CBE | CBG | CBJ |
| 45 | 44 | 47 | 2 | 120.0 | 560.0 | 120.0 | 560.0 ; | CBH | CBG | CBJ |
| 44 | 45 | 46 | 2 | 121.0 | 685.0 | 121.0 | 685.0 ; | CBG | CBH | OBI |
| 44 | 45 | 52 | 2 | 120.0 | 560.0 | 120.0 | 560.0 ; | CBG | CBH | CBN |
| 46 | 45 | 52 | 2 | 121.0 | 685.0 | 121.0 | 685.0 ; | OBI | CBH | CBN |
| 39 | 47 | 44 | 2 | 115.0 | 610.0 | 115.0 | 610.0 ; | OBC | CBJ | CBG |
| 39 | 47 | 48 | 2 | 115.0 | 610.0 | 115.0 | 610.0 ; | OBC | CBJ | CBK |
| 44 | 47 | 48 | 2 | 120.0 | 560.0 | 120.0 | 560.0 ; | CBG | CBJ | CBK |
| 47 | 48 | 49 | 2 | 121.0 | 685.0 | 121.0 | 685.0 ; | CBJ | CBK | OBL |
| 47 | 48 | 50 | 2 | 120.0 | 560.0 | 120.0 | 560.0 ; | CBJ | CBK | CBM |
| 49 | 48 | 50 | 2 | 120.0 | 560.0 | 120.0 | 560.0 ; | OBL | CBK | CBM |

|    |    |    |   |       |       |       |         |     |     |     |
|----|----|----|---|-------|-------|-------|---------|-----|-----|-----|
| 48 | 50 | 51 | 2 | 120.0 | 505.0 | 120.0 | 505.0 ; | CBK | CBM | HBM |
| 48 | 50 | 52 | 2 | 120.0 | 505.0 | 120.0 | 505.0 ; | CBK | CBM | CBN |
| 51 | 50 | 52 | 2 | 120.0 | 505.0 | 120.0 | 505.0 ; | HBM | CBM | CBN |
| 45 | 52 | 50 | 2 | 120.0 | 560.0 | 120.0 | 560.0 ; | CBH | CBN | CBM |
| 45 | 52 | 53 | 2 | 115.0 | 610.0 | 115.0 | 610.0 ; | CBH | CBN | OBO |
| 50 | 52 | 53 | 2 | 120.0 | 560.0 | 120.0 | 560.0 ; | CBM | CBN | OBO |
| 52 | 53 | 54 | 2 | 109.5 | 380.0 | 109.5 | 380.0 ; | CBN | OBO | CBP |
| 53 | 54 | 55 | 2 | 115.0 | 610.0 | 115.0 | 610.0 ; | OBO | CBP | CBQ |
| 53 | 54 | 60 | 2 | 115.0 | 610.0 | 115.0 | 610.0 ; | OBO | CBP | CBT |
| 55 | 54 | 60 | 2 | 120.0 | 560.0 | 120.0 | 560.0 ; | CBQ | CBP | CBT |
| 54 | 55 | 56 | 2 | 120.0 | 560.0 | 120.0 | 560.0 ; | CBP | CBQ | CBR |
| 54 | 55 | 58 | 2 | 115.0 | 610.0 | 115.0 | 610.0 ; | CBP | CBQ | OBS |
| 56 | 55 | 58 | 2 | 120.0 | 560.0 | 120.0 | 560.0 ; | CBR | CBQ | OBS |
| 55 | 56 | 57 | 2 | 120.0 | 505.0 | 120.0 | 505.0 ; | CBQ | CBR | HBR |
| 55 | 56 | 83 | 2 | 120.0 | 505.0 | 120.0 | 505.0 ; | CBQ | CBR | CCH |
| 57 | 56 | 83 | 2 | 120.0 | 505.0 | 120.0 | 505.0 ; | HBR | CBR | CCH |
| 55 | 58 | 59 | 2 | 109.5 | 450.0 | 109.5 | 450.0 ; | CBQ | OBS | HBS |
| 54 | 60 | 61 | 2 | 115.0 | 610.0 | 115.0 | 610.0 ; | CBP | CBT | N   |
| 54 | 60 | 81 | 2 | 120.0 | 560.0 | 120.0 | 560.0 ; | CBP | CBT | CCG |
| 61 | 60 | 81 | 2 | 120.0 | 560.0 | 120.0 | 560.0 ; | N   | CBT | CCG |
| 60 | 61 | 62 | 2 | 123.0 | 415.0 | 123.0 | 415.0 ; | CBT | N   | H   |
| 60 | 61 | 63 | 2 | 122.0 | 700.0 | 122.0 | 700.0 ; | CBT | N   | CA  |
| 62 | 61 | 63 | 2 | 120.0 | 505.0 | 120.0 | 505.0 ; | H   | N   | CA  |
| 61 | 63 | 64 | 2 | 109.5 | 520.0 | 109.5 | 520.0 ; | N   | CA  | C   |
| 61 | 63 | 69 | 2 | 109.5 | 520.0 | 109.5 | 520.0 ; | N   | CA  | CBZ |
| 64 | 63 | 69 | 2 | 109.5 | 520.0 | 109.5 | 520.0 ; | C   | CA  | CBZ |
| 63 | 64 | 65 | 2 | 121.0 | 685.0 | 121.0 | 685.0 ; | CA  | C   | O   |
| 63 | 64 | 66 | 2 | 115.0 | 610.0 | 115.0 | 610.0 ; | CA  | C   | NBY |
| 65 | 64 | 66 | 2 | 124.0 | 730.0 | 124.0 | 730.0 ; | O   | C   | NBY |
| 64 | 66 | 67 | 2 | 120.0 | 390.0 | 120.0 | 390.0 ; | C   | NBY | HKL |
| 64 | 66 | 68 | 2 | 120.0 | 390.0 | 120.0 | 390.0 ; | C   | NBY | HBV |
| 67 | 66 | 68 | 2 | 120.0 | 445.0 | 120.0 | 445.0 ; | HKL | NBY | HBV |
| 63 | 69 | 70 | 2 | 120.0 | 560.0 | 120.0 | 560.0 ; | CA  | CBZ | CCA |
| 63 | 69 | 79 | 2 | 120.0 | 560.0 | 120.0 | 560.0 ; | CA  | CBZ | CCF |
| 70 | 69 | 79 | 2 | 120.0 | 560.0 | 120.0 | 560.0 ; | CCA | CBZ | CCF |
| 69 | 70 | 71 | 2 | 120.0 | 505.0 | 120.0 | 505.0 ; | CBZ | CCA | HCA |
| 69 | 70 | 72 | 2 | 120.0 | 505.0 | 120.0 | 505.0 ; | CBZ | CCA | CCB |
| 71 | 70 | 72 | 2 | 120.0 | 505.0 | 120.0 | 505.0 ; | HCA | CCA | CCB |
| 70 | 72 | 73 | 2 | 120.0 | 505.0 | 120.0 | 505.0 ; | CCA | CCB | HCB |
| 70 | 72 | 74 | 2 | 120.0 | 505.0 | 120.0 | 505.0 ; | CCA | CCB | CCC |
| 73 | 72 | 74 | 2 | 120.0 | 505.0 | 120.0 | 505.0 ; | HCB | CCB | CCC |
| 72 | 74 | 75 | 2 | 120.0 | 560.0 | 120.0 | 560.0 ; | CCB | CCC | OCD |
| 72 | 74 | 77 | 2 | 120.0 | 560.0 | 120.0 | 560.0 ; | CCB | CCC | CCE |
| 75 | 74 | 77 | 2 | 120.0 | 560.0 | 120.0 | 560.0 ; | OCD | CCC | CCE |
| 74 | 75 | 76 | 2 | 109.5 | 450.0 | 109.5 | 450.0 ; | CCC | OCD | HCD |
| 74 | 77 | 78 | 2 | 120.0 | 505.0 | 120.0 | 505.0 ; | CCC | CCE | HCE |
| 74 | 77 | 79 | 2 | 120.0 | 505.0 | 120.0 | 505.0 ; | CCC | CCE | CCF |
| 78 | 77 | 79 | 2 | 120.0 | 505.0 | 120.0 | 505.0 ; | HCE | CCE | CCF |
| 69 | 79 | 77 | 2 | 120.0 | 505.0 | 120.0 | 505.0 ; | CBZ | CCF | CCE |
| 69 | 79 | 80 | 2 | 120.0 | 505.0 | 120.0 | 505.0 ; | CBZ | CCF | HCF |
| 77 | 79 | 80 | 2 | 120.0 | 505.0 | 120.0 | 505.0 ; | CCE | CCF | HCF |
| 60 | 81 | 82 | 2 | 120.0 | 505.0 | 120.0 | 505.0 ; | CBT | CCG | HCG |
| 60 | 81 | 83 | 2 | 120.0 | 505.0 | 120.0 | 505.0 ; | CBT | CCG | CCH |
| 82 | 81 | 83 | 2 | 120.0 | 505.0 | 120.0 | 505.0 ; | HCG | CCG | CCH |
| 56 | 83 | 81 | 2 | 120.0 | 560.0 | 120.0 | 560.0 ; | CBR | CCH | CCG |
| 56 | 83 | 84 | 2 | 120.0 | 560.0 | 120.0 | 560.0 ; | CBR | CCH | CCI |
| 81 | 83 | 84 | 2 | 120.0 | 560.0 | 120.0 | 560.0 ; | CCG | CCH | CCI |



|     |     |     |   |       |       |       |         |     |     |     |
|-----|-----|-----|---|-------|-------|-------|---------|-----|-----|-----|
| 83  | 84  | 85  | 2 | 120.0 | 560.0 | 120.0 | 560.0 ; | CCH | CCI | NCJ |
| 83  | 84  | 86  | 2 | 120.0 | 560.0 | 120.0 | 560.0 ; | CCH | CCI | CCK |
| 85  | 84  | 86  | 2 | 120.0 | 560.0 | 120.0 | 560.0 ; | NCJ | CCI | CCK |
| 84  | 85  | 109 | 2 | 120.0 | 560.0 | 120.0 | 560.0 ; | CCI | NCJ | CDB |
| 84  | 86  | 87  | 2 | 115.0 | 610.0 | 115.0 | 610.0 ; | CCI | CCK | OCL |
| 84  | 86  | 104 | 2 | 120.0 | 560.0 | 120.0 | 560.0 ; | CCI | CCK | CCY |
| 87  | 86  | 104 | 2 | 120.0 | 560.0 | 120.0 | 560.0 ; | OCL | CCK | CCY |
| 86  | 87  | 88  | 2 | 109.5 | 380.0 | 109.5 | 380.0 ; | CCK | OCL | CCM |
| 87  | 88  | 89  | 2 | 124.0 | 730.0 | 124.0 | 730.0 ; | OCL | CCM | OCN |
| 87  | 88  | 90  | 2 | 115.0 | 610.0 | 115.0 | 610.0 ; | OCL | CCM | CCO |
| 89  | 88  | 90  | 2 | 121.0 | 685.0 | 121.0 | 685.0 ; | OCN | CCM | CCO |
| 88  | 90  | 91  | 2 | 109.5 | 520.0 | 109.5 | 520.0 ; | CCM | CCO | OCP |
| 88  | 90  | 93  | 2 | 109.5 | 520.0 | 109.5 | 520.0 ; | CCM | CCO | CCQ |
| 91  | 90  | 93  | 2 | 109.5 | 520.0 | 109.5 | 520.0 ; | OCP | CCO | CCQ |
| 90  | 91  | 92  | 2 | 109.5 | 450.0 | 109.5 | 450.0 ; | CCO | OCP | HCP |
| 90  | 93  | 94  | 2 | 109.5 | 520.0 | 109.5 | 520.0 ; | CCO | CCQ | OCR |
| 90  | 93  | 96  | 2 | 109.5 | 520.0 | 109.5 | 520.0 ; | CCO | CCQ | CCS |
| 94  | 93  | 96  | 2 | 109.5 | 520.0 | 109.5 | 520.0 ; | OCR | CCQ | CCS |
| 93  | 94  | 95  | 2 | 109.5 | 450.0 | 109.5 | 450.0 ; | CCQ | OCR | HCR |
| 93  | 96  | 97  | 2 | 109.5 | 520.0 | 109.5 | 520.0 ; | CCQ | CCS | OCT |
| 93  | 96  | 99  | 2 | 109.5 | 520.0 | 109.5 | 520.0 ; | CCQ | CCS | CCU |
| 97  | 96  | 99  | 2 | 109.5 | 520.0 | 109.5 | 520.0 ; | OCT | CCS | CCU |
| 96  | 97  | 98  | 2 | 109.5 | 450.0 | 109.5 | 450.0 ; | CCS | OCT | HCT |
| 96  | 99  | 100 | 2 | 109.5 | 520.0 | 109.5 | 520.0 ; | CCS | CCU | CCV |
| 96  | 99  | 102 | 2 | 109.5 | 520.0 | 109.5 | 520.0 ; | CCS | CCU | OCX |
| 100 | 99  | 102 | 2 | 109.5 | 520.0 | 109.5 | 520.0 ; | CCV | CCU | OCX |
| 99  | 100 | 101 | 2 | 121.0 | 685.0 | 121.0 | 685.0 ; | CCU | CCV | OCW |
| 99  | 102 | 103 | 2 | 109.5 | 450.0 | 109.5 | 450.0 ; | CCU | OCX | HCX |
| 86  | 104 | 105 | 2 | 120.0 | 505.0 | 120.0 | 505.0 ; | CCK | CCY | HCY |
| 86  | 104 | 106 | 2 | 120.0 | 505.0 | 120.0 | 505.0 ; | CCK | CCY | CCZ |
| 105 | 104 | 106 | 2 | 120.0 | 505.0 | 120.0 | 505.0 ; | HCY | CCY | CCZ |
| 104 | 106 | 107 | 2 | 120.0 | 560.0 | 120.0 | 560.0 ; | CCY | CCZ | CDA |
| 104 | 106 | 109 | 2 | 120.0 | 560.0 | 120.0 | 560.0 ; | CCY | CCZ | CDB |
| 107 | 106 | 109 | 2 | 120.0 | 560.0 | 120.0 | 560.0 ; | CDA | CCZ | CDB |
| 106 | 107 | 108 | 2 | 120.0 | 505.0 | 120.0 | 505.0 ; | CCZ | CDA | HDA |
| 106 | 107 | 114 | 2 | 120.0 | 505.0 | 120.0 | 505.0 ; | CCZ | CDA | CDF |
| 108 | 107 | 114 | 2 | 120.0 | 505.0 | 120.0 | 505.0 ; | HDA | CDA | CDF |
| 85  | 109 | 106 | 2 | 120.0 | 560.0 | 120.0 | 560.0 ; | NCJ | CDB | CCZ |
| 85  | 109 | 110 | 2 | 120.0 | 560.0 | 120.0 | 560.0 ; | NCJ | CDB | CDC |
| 106 | 109 | 110 | 2 | 120.0 | 560.0 | 120.0 | 560.0 ; | CCZ | CDB | CDC |
| 109 | 110 | 111 | 2 | 115.0 | 610.0 | 115.0 | 610.0 ; | CDB | CDC | ODD |
| 109 | 110 | 112 | 2 | 120.0 | 560.0 | 120.0 | 560.0 ; | CDB | CDC | CDE |
| 111 | 110 | 112 | 2 | 120.0 | 560.0 | 120.0 | 560.0 ; | ODD | CDC | CDE |
| 110 | 112 | 113 | 2 | 120.0 | 505.0 | 120.0 | 505.0 ; | CDC | CDE | HDE |
| 110 | 112 | 114 | 2 | 120.0 | 505.0 | 120.0 | 505.0 ; | CDC | CDE | CDF |
| 113 | 112 | 114 | 2 | 120.0 | 505.0 | 120.0 | 505.0 ; | HDE | CDE | CDF |
| 107 | 114 | 112 | 2 | 120.0 | 560.0 | 120.0 | 560.0 ; | CDA | CDF | CDE |
| 107 | 114 | 115 | 2 | 120.0 | 560.0 | 120.0 | 560.0 ; | CDA | CDF | ODG |
| 112 | 114 | 115 | 2 | 120.0 | 560.0 | 120.0 | 560.0 ; | CDE | CDF | ODG |
| 114 | 115 | 116 | 2 | 109.5 | 380.0 | 109.5 | 380.0 ; | CDF | ODG | CDH |
| 115 | 116 | 117 | 2 | 120.0 | 560.0 | 120.0 | 560.0 ; | ODG | CDH | CDI |
| 115 | 116 | 152 | 2 | 115.0 | 610.0 | 115.0 | 610.0 ; | ODG | CDH | CEL |
| 117 | 116 | 152 | 2 | 120.0 | 560.0 | 120.0 | 560.0 ; | CDI | CDH | CEL |
| 116 | 117 | 118 | 2 | 120.0 | 505.0 | 120.0 | 505.0 ; | CDH | CDI | HDI |
| 116 | 117 | 119 | 2 | 120.0 | 505.0 | 120.0 | 505.0 ; | CDH | CDI | CDJ |
| 118 | 117 | 119 | 2 | 120.0 | 505.0 | 120.0 | 505.0 ; | HDI | CDI | CDJ |
| 117 | 119 | 120 | 2 | 120.0 | 560.0 | 120.0 | 560.0 ; | CDI | CDJ | CDK |

|     |     |     |   |       |       |       |         |     |     |     |
|-----|-----|-----|---|-------|-------|-------|---------|-----|-----|-----|
| 117 | 119 | 149 | 2 | 120.0 | 560.0 | 120.0 | 560.0 ; | CDI | CDJ | CEJ |
| 120 | 119 | 149 | 2 | 120.0 | 560.0 | 120.0 | 560.0 ; | CDK | CDJ | CEJ |
| 119 | 120 | 121 | 2 | 121.0 | 685.0 | 121.0 | 685.0 ; | CDJ | CDK | ODL |
| 119 | 120 | 122 | 2 | 120.0 | 560.0 | 120.0 | 560.0 ; | CDJ | CDK | CDM |
| 121 | 120 | 122 | 2 | 121.0 | 685.0 | 121.0 | 685.0 ; | ODL | CDK | CDM |
| 120 | 122 | 123 | 2 | 121.0 | 685.0 | 121.0 | 685.0 ; | CDK | CDM | ODN |
| 120 | 122 | 124 | 2 | 120.0 | 560.0 | 120.0 | 560.0 ; | CDK | CDM | CDO |
| 123 | 122 | 124 | 2 | 121.0 | 685.0 | 121.0 | 685.0 ; | ODN | CDM | CDO |
| 122 | 124 | 125 | 2 | 120.0 | 560.0 | 120.0 | 560.0 ; | CDM | CDO | CDP |
| 122 | 124 | 148 | 2 | 120.0 | 560.0 | 120.0 | 560.0 ; | CDM | CDO | CEI |
| 125 | 124 | 148 | 2 | 120.0 | 560.0 | 120.0 | 560.0 ; | CDP | CDO | CEI |
| 124 | 125 | 126 | 2 | 115.0 | 610.0 | 115.0 | 610.0 ; | CDO | CDP | ODQ |
| 124 | 125 | 128 | 2 | 120.0 | 560.0 | 120.0 | 560.0 ; | CDO | CDP | CDR |
| 126 | 125 | 128 | 2 | 115.0 | 610.0 | 115.0 | 610.0 ; | ODQ | CDP | CDR |
| 125 | 126 | 127 | 2 | 109.5 | 450.0 | 109.5 | 450.0 ; | CDP | ODQ | HDQ |
| 125 | 128 | 129 | 2 | 132.0 | 760.0 | 132.0 | 760.0 ; | CDP | CDR | CDS |
| 125 | 128 | 145 | 2 | 120.0 | 560.0 | 120.0 | 560.0 ; | CDP | CDR | CEG |
| 129 | 128 | 145 | 2 | 108.0 | 465.0 | 108.0 | 465.0 ; | CDS | CDR | CEG |
| 128 | 129 | 130 | 2 | 132.0 | 760.0 | 132.0 | 760.0 ; | CDR | CDS | CDT |
| 128 | 129 | 143 | 2 | 108.0 | 465.0 | 108.0 | 465.0 ; | CDR | CDS | CEE |
| 130 | 129 | 143 | 2 | 120.0 | 560.0 | 120.0 | 560.0 ; | CDT | CDS | CEE |
| 129 | 130 | 131 | 2 | 115.0 | 610.0 | 115.0 | 610.0 ; | CDS | CDT | ODU |
| 129 | 130 | 133 | 2 | 120.0 | 560.0 | 120.0 | 560.0 ; | CDS | CDT | CDV |
| 131 | 130 | 133 | 2 | 115.0 | 610.0 | 115.0 | 610.0 ; | ODU | CDT | CDV |
| 130 | 131 | 132 | 2 | 109.5 | 450.0 | 109.5 | 450.0 ; | CDT | ODU | HDU |
| 130 | 133 | 134 | 2 | 120.0 | 560.0 | 120.0 | 560.0 ; | CDT | CDV | CDW |
| 130 | 133 | 137 | 2 | 120.0 | 560.0 | 120.0 | 560.0 ; | CDT | CDV | CDZ |
| 134 | 133 | 137 | 2 | 120.0 | 560.0 | 120.0 | 560.0 ; | CDW | CDV | CDZ |
| 133 | 134 | 135 | 2 | 126.0 | 770.0 | 126.0 | 770.0 ; | CDV | CDW | ODX |
| 133 | 134 | 136 | 2 | 126.0 | 770.0 | 126.0 | 770.0 ; | CDV | CDW | ODY |
| 135 | 134 | 136 | 2 | 126.0 | 770.0 | 126.0 | 770.0 ; | ODX | CDW | ODY |
| 133 | 137 | 138 | 2 | 120.0 | 560.0 | 120.0 | 560.0 ; | CDV | CDZ | CEA |
| 133 | 137 | 141 | 2 | 120.0 | 560.0 | 120.0 | 560.0 ; | CDV | CDZ | CED |
| 138 | 137 | 141 | 2 | 120.0 | 560.0 | 120.0 | 560.0 ; | CEA | CDZ | CED |
| 137 | 138 | 139 | 2 | 126.0 | 770.0 | 126.0 | 770.0 ; | CDZ | CEA | OEB |
| 137 | 138 | 140 | 2 | 126.0 | 770.0 | 126.0 | 770.0 ; | CDZ | CEA | OEC |
| 139 | 138 | 140 | 2 | 126.0 | 770.0 | 126.0 | 770.0 ; | OEB | CEA | OEC |
| 137 | 141 | 142 | 2 | 120.0 | 505.0 | 120.0 | 505.0 ; | CDZ | CED | HED |
| 137 | 141 | 143 | 2 | 120.0 | 505.0 | 120.0 | 505.0 ; | CDZ | CED | CEE |
| 142 | 141 | 143 | 2 | 120.0 | 505.0 | 120.0 | 505.0 ; | HED | CED | CEE |
| 129 | 143 | 141 | 2 | 120.0 | 560.0 | 120.0 | 560.0 ; | CDS | CEE | CED |
| 129 | 143 | 144 | 2 | 108.0 | 465.0 | 108.0 | 465.0 ; | CDS | CEE | OEF |
| 141 | 143 | 144 | 2 | 132.0 | 760.0 | 132.0 | 760.0 ; | CED | CEE | OEF |
| 143 | 144 | 145 | 2 | 108.5 | 418.7 | 108.5 | 418.7 ; | CEE | OEF | CEG |
| 128 | 145 | 144 | 2 | 108.0 | 465.0 | 108.0 | 465.0 ; | CDR | CEG | OEF |
| 128 | 145 | 146 | 2 | 120.0 | 560.0 | 120.0 | 560.0 ; | CDR | CEG | CEH |
| 144 | 145 | 146 | 2 | 132.0 | 760.0 | 132.0 | 760.0 ; | OEF | CEG | CEH |
| 145 | 146 | 147 | 2 | 120.0 | 505.0 | 120.0 | 505.0 ; | CEG | CEH | HEH |
| 145 | 146 | 148 | 2 | 120.0 | 505.0 | 120.0 | 505.0 ; | CEG | CEH | CEI |
| 147 | 146 | 148 | 2 | 120.0 | 505.0 | 120.0 | 505.0 ; | HEH | CEH | CEI |
| 124 | 148 | 146 | 2 | 120.0 | 560.0 | 120.0 | 560.0 ; | CDO | CEI | CEH |
| 124 | 148 | 149 | 2 | 120.0 | 560.0 | 120.0 | 560.0 ; | CDO | CEI | CEJ |
| 146 | 148 | 149 | 2 | 120.0 | 560.0 | 120.0 | 560.0 ; | CEH | CEI | CEJ |
| 119 | 149 | 148 | 2 | 120.0 | 560.0 | 120.0 | 560.0 ; | CDJ | CEJ | CEI |
| 119 | 149 | 150 | 2 | 120.0 | 560.0 | 120.0 | 560.0 ; | CDJ | CEJ | CEK |
| 148 | 149 | 150 | 2 | 120.0 | 560.0 | 120.0 | 560.0 ; | CEI | CEJ | CEK |
| 149 | 150 | 151 | 2 | 120.0 | 505.0 | 120.0 | 505.0 ; | CEJ | CEK | HEK |

















|     |     |     |     |   |       |      |   |       |      |         |     |     |
|-----|-----|-----|-----|---|-------|------|---|-------|------|---------|-----|-----|
| 152 | 116 | 115 | 114 | 1 | 180.0 | 16.7 | 2 | 180.0 | 16.7 | 2 ; dih | CEL | CDH |
| ODG | ODG | CDF |     |   |       |      |   |       |      |         |     |     |
| 124 | 125 | 126 | 127 | 1 | 180.0 | 7.1  | 2 | 180.0 | 7.1  | 2 ; dih | CDO | CDP |
| ODQ | ODQ | HDQ |     |   |       |      |   |       |      |         |     |     |
| 129 | 130 | 131 | 132 | 1 | 180.0 | 7.1  | 2 | 180.0 | 7.1  | 2 ; dih | CDS | CDT |
| ODU | ODU | HDU |     |   |       |      |   |       |      |         |     |     |
| 136 | 134 | 133 | 130 | 1 | 180.0 | 5.9  | 2 | 180.0 | 5.9  | 2 ; dih | ODY | CDW |
| CDV | CDV | CDT |     |   |       |      |   |       |      |         |     |     |
| 140 | 138 | 137 | 133 | 1 | 180.0 | 5.9  | 2 | 180.0 | 5.9  | 2 ; dih | OEC | CEA |
| CDZ | CDZ | CDV |     |   |       |      |   |       |      |         |     |     |
| 116 | 152 | 153 | 154 | 1 | 180.0 | 7.1  | 2 | 180.0 | 7.1  | 2 ; dih | CDH | CEL |
| OEM | OEM | HEM |     |   |       |      |   |       |      |         |     |     |

[ system ]  
; Name  
xmo in water

[ molecules ]  
; Compound #mols  
xmo 1  
SOL 7751  
NA+ 4

**(ii) Binding energy Evaluation:**

Uranyl binding at FA-4 originates by doubly deprotonating the hydroxo groups, whereas in the other three binding sites of FA, they are singly deprotonated. Hence, due to the differing charges, binding energy comparison cannot be made directly within the four models. However, energetics comparison has been performed by adding and subtracting hydronium ions and water to balance the equation. By doing this the energetics of all four structures can be cross compared.

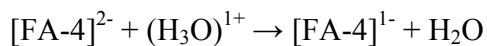

Binding energies are computed using the following equation,

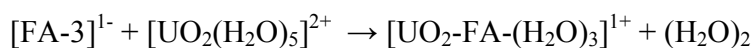

Prior to uranyl binding, FA-3 is the lowest energy species, and hence all binding energies are evaluated with respect to FA-3 only.

Similarly binding energy were also carried out for HA models.
